# Supplementary material
Source: publisher site journal article supplement (https://www.dovepress.com/article/299774)
Supplement: Supplementary file 1 [file get_supplementary_file.php]

## Supplementary data

**Table S1** Hospital wise details of patients with multi drug resistant organisms (MDRO) infections and outcomes

| Hospitals | No. of patients with COVID-19 (n) | No. of patients with secondary infections (n/%) | No. of patients with MDROs (n/%) | Outcomes in MDRO infected (n/%)    |
|-----------|-----------------------------------|-------------------------------------------------|----------------------------------|------------------------------------|
| H1        | 1089                              | 19 (1.7%)                                       | 3 (15.7%)                        | Death:3 (100%)                     |
| H2        | 1552                              | 145 (9.3%)                                      | 103 (71.0%)                      | Death: 73 (70.8%)<br>Recovered: 30 |
| H3        | 4590                              | 104 (2.2%)                                      | 21 (20.1%)                       | Death:17 (80.9%)<br>Recovered: 4   |
| H4        | 612                               | 58 (9.4%)                                       | 25 (45.4%)                       | Death:14 (56.0%)<br>Recovered: 11  |
| H5        | 1082                              | 38 (3.5%)                                       | -                                | --                                 |
| H6        | 5132                              | 63 (1.2%)                                       | 41 (65.0%)                       | Death:30 (73.1%)<br>Recovered: 11  |
| H7        | 2598                              | 11 (0.4%)                                       | 4 (36.3%)                        | Death:1 (25.0%)<br>Recovered: 3    |
| H8        | 459                               | 85 (18.5%)                                      | 28 (32.9%)                       | Death:18 (64.2%)<br>Recovered: 10  |
| H9        | 70                                | 17 (24.2%)                                      | -                                | --                                 |
| H10       | 350                               | 100 (28.5%)                                     | 77 (77.0%)                       | Death:44 (57.1%)<br>Recovered: 33  |

**Table S2** Hospital wise details of sample collection for culture of patients diagnosed with SIs

| Hospitals | Total patients | Total samples sent for culture | Cultures sent per patient | Total no. of patients with SIs | % patients diagnosed with SIs |
|-----------|----------------|--------------------------------|---------------------------|--------------------------------|-------------------------------|
| H1        | 1089           | 129                            | 0.11                      | 19                             | 1.7                           |
| H2        | 1552           | 2060                           | 1.32                      | 145                            | 10.0                          |
| H3        | 4590           | 2373                           | 0.51                      | 104                            | 2.2                           |
| H4        | 612            | 390                            | 0.63                      | 58                             | 9.4                           |
| H5        | 1082           | 217                            | 0.2                       | 38                             | 3.5                           |
| H6        | 5132           | 98                             | 0.01                      | 63                             | 1.2                           |
| H7        | 2598           | 374                            | 0.14                      | 11                             | 0.4                           |
| H8        | 459            | 570                            | 1.24                      | 85                             | 18                            |
| H9        | 70             | 229                            | 3.2                       | 17                             | 24                            |
| H10       | 350            | 723                            | 2.0                       | 100                            | 28.5                          |

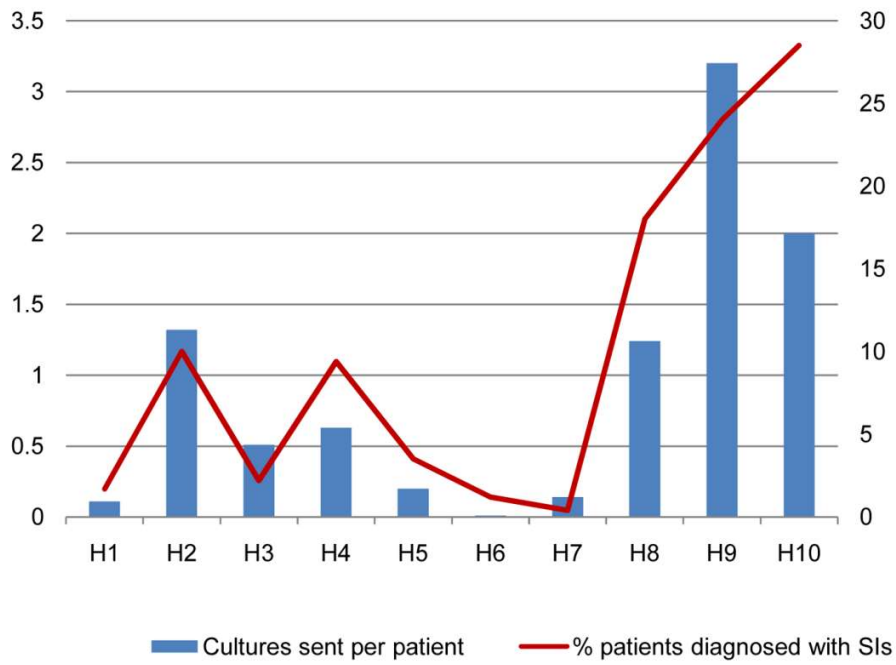

**Figure S1** Correlation between culture collected and patients diagnosed with secondary infections
